# Supplementary material for: Use of Azacitidine or Decitabine for the Up-Front Setting in Acute Myeloid Leukaemia: A Systematic Review and Meta-Analysis
Source: MDPI journal article supplement (doi:10.3390/cancers13225677), 2021-11-12
Supplement: s1 [file s1]

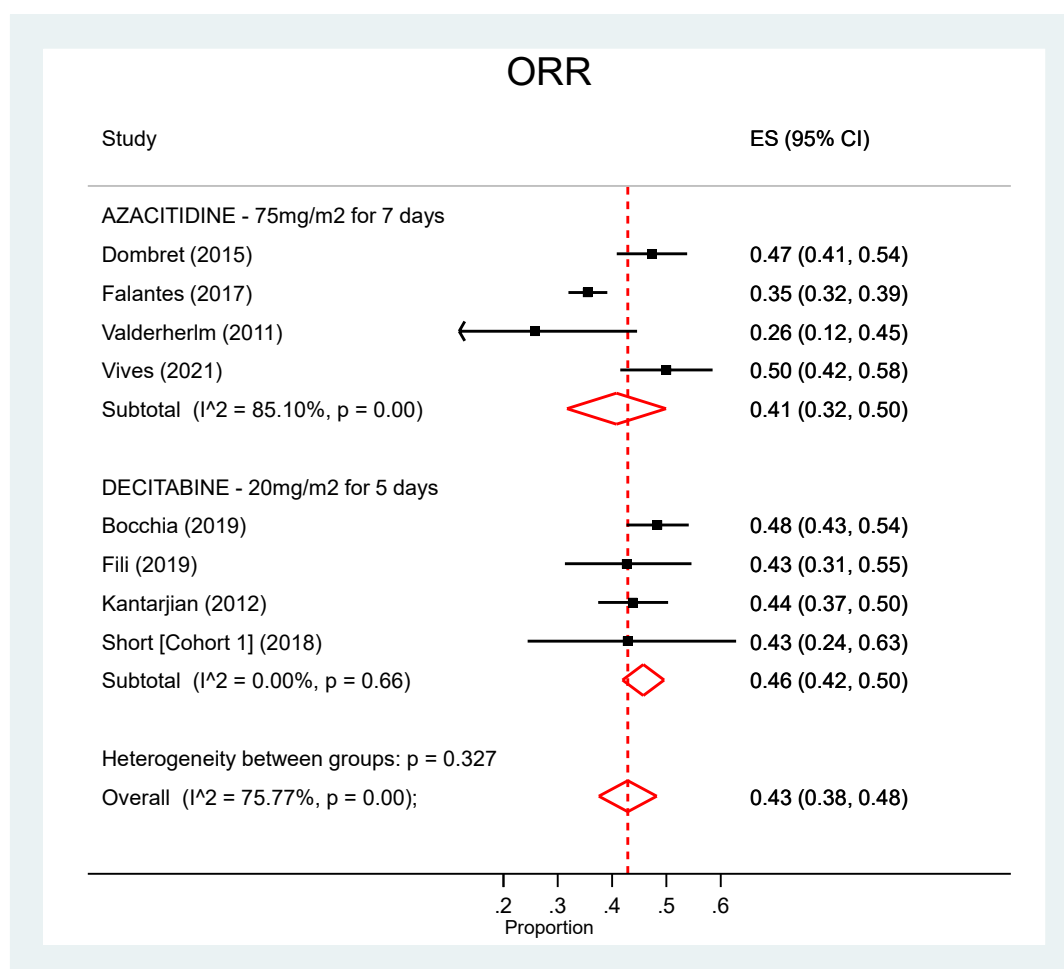

**Supplementary figure S1.** Overall response rate (ORR) analysis of azacitidine approved regimen (75mg/m<sup>2</sup> for 7 days) versus decitabine approved regimen (20mg/m<sup>2</sup> for 5 days).

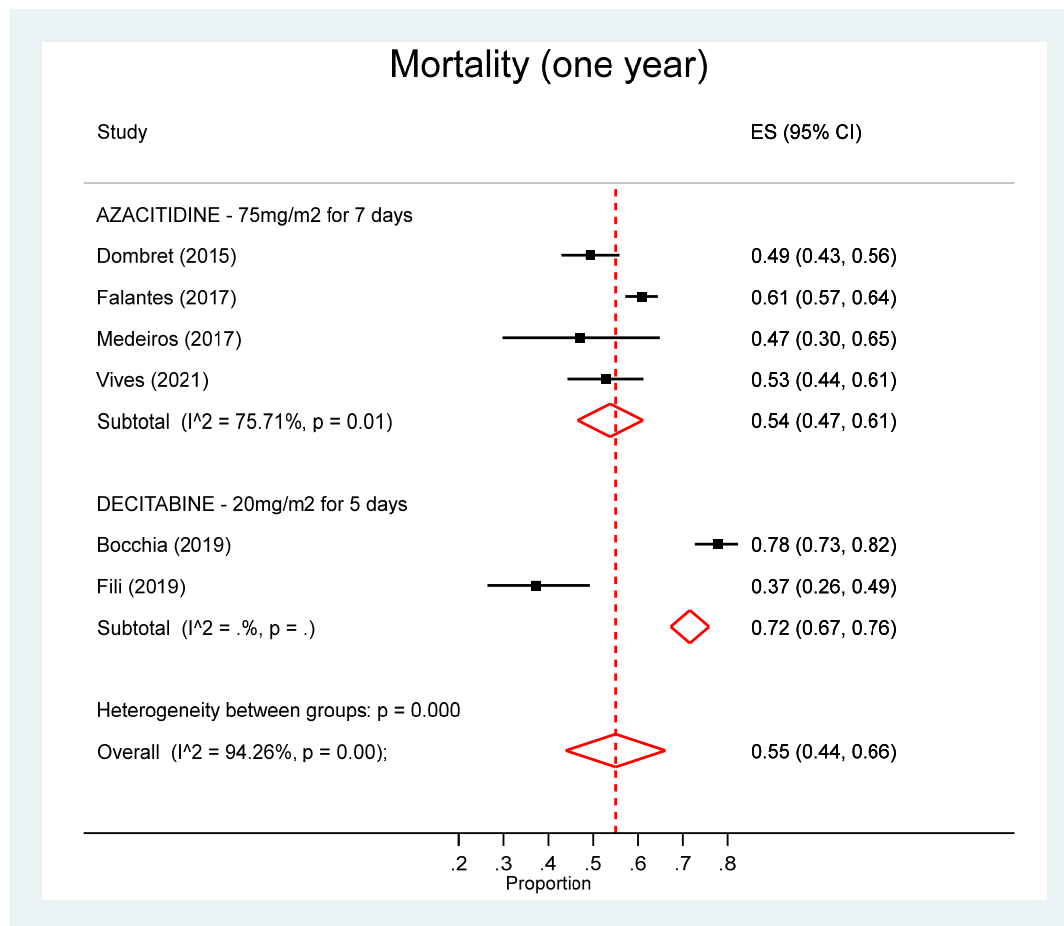

**Supplementary figure S2.** 1-year mortality analysis of azacitidine approved regimen (75mg/m<sup>2</sup> for 7 days) versus decitabine approved regimen (20mg/m<sup>2</sup> for 5 days).

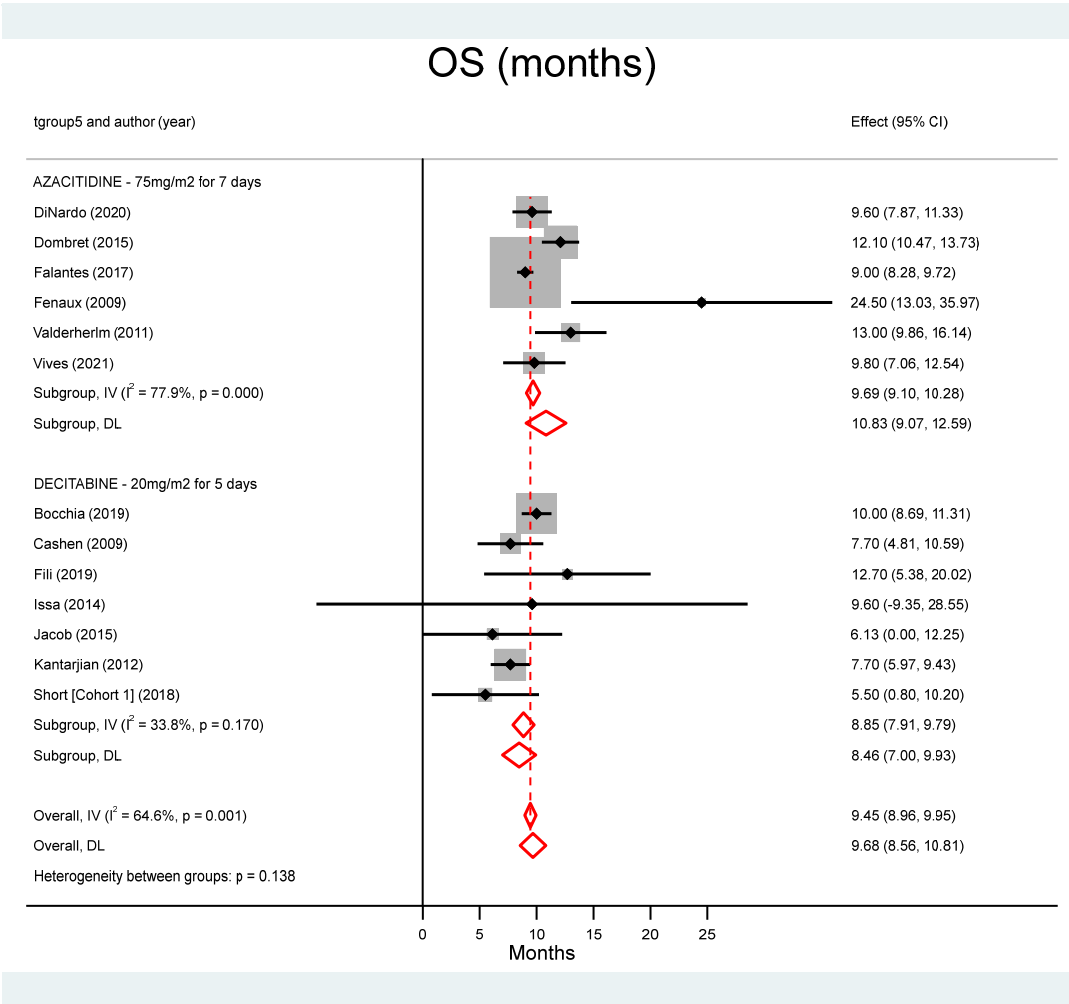

**Supplementary figure S3.** Overall survival (OS) analysis of azacitidine approved regimen (75mg/m<sup>2</sup> for 7 days) versus decitabine approved regimen (20mg/m<sup>2</sup> for 5 days).

**Supplementary table S1.** Complete search strategy in the different reviewed databases.

| AGENT       | DATABASE                                       | SEARCH STRATEGY                                                                                                                                                                                                                                                                                                                                                                                                                                                                                                                                           |
|-------------|------------------------------------------------|-----------------------------------------------------------------------------------------------------------------------------------------------------------------------------------------------------------------------------------------------------------------------------------------------------------------------------------------------------------------------------------------------------------------------------------------------------------------------------------------------------------------------------------------------------------|
| AZACITIDINE | Medline (searched through Pubmed)              | ((((((acute myeloid[Title/Abstract] AND leukemia[Title/Abstract]) OR ("leukaemia"[Title/Abstract] OR "leukemia"[MeSH Terms] OR "leukemia"[Title/Abstract])) AND older[Title/Abstract]) OR ("aged"[MeSH Terms] OR "aged"[All Fields] OR "elderly"[Title/Abstract])) OR unfit[Title/Abstract]) AND ("azacitidine"[MeSH Terms] OR "azacitidine"[Title/Abstract])) AND ("clinical trials as topic"[MeSH Terms] OR ("clinical"[All Fields] AND "trials"[All Fields] AND "topic"[All Fields]) OR "clinical trials as topic"[All Fields] OR "trial"[All Fields]) |
|             | Cochrane Central Register of Controlled Trials | "acute myeloid leukemia" and "azacitidine"                                                                                                                                                                                                                                                                                                                                                                                                                                                                                                                |
|             | EU Clinical Trials Register                    | acute myeloid leukemia AND azacitidine; trials with results                                                                                                                                                                                                                                                                                                                                                                                                                                                                                               |
|             | ClinicalTrials.gov                             | Condition: acute myeloid leukemia<br>Intervention: azacitidine<br>Other terms: older/elderly/unfit<br>Studies with results                                                                                                                                                                                                                                                                                                                                                                                                                                |
| DECITABINE  | Medline (searched through Pubmed)              | ((((((acute myeloid[Title/Abstract] AND leukemia[Title/Abstract]) OR ("leukaemia"[Title/Abstract] OR "leukemia"[MeSH Terms] OR "leukemia"[Title/Abstract])) AND older[Title/Abstract]) OR ("aged"[MeSH Terms] OR "aged"[All Fields] OR "elderly"[Title/Abstract])) OR unfit[Title/Abstract]) AND ("decitabine"[MeSH Terms] OR "decitabine"[Title/Abstract])) AND ("clinical trials as topic"[MeSH Terms] OR ("clinical"[All Fields] AND "trials"[All Fields] AND "topic"[All Fields]) OR "clinical trials as topic"[All Fields] OR "trial"[All Fields])   |
|             | Cochrane Central Register of Controlled Trials | "acute myeloid leukemia" and "decitabine"                                                                                                                                                                                                                                                                                                                                                                                                                                                                                                                 |
|             | EU Clinical Trials Register                    | acute myeloid leukemia AND decitabine; trials with results                                                                                                                                                                                                                                                                                                                                                                                                                                                                                                |
|             | ClinicalTrials.gov                             | Condition: acute myeloid leukemia<br>Intervention: decitabine<br>Other terms: older/elderly/unfit<br>Studies with results                                                                                                                                                                                                                                                                                                                                                                                                                                 |
